# Supplementary material for: Safety and effectiveness of balloon cryoablation for treatment of Barrett’s associated neoplasia: systematic review and meta-analysis
Source: PubMed Central journal article supplement — Endosc Int Open. 2020 Jan 22;8(2):E172–8. doi: 10.1055/a-1067-4520 (PMC6976310; doi:10.1055/a-1067-4520), 2020-01-22
Supplement: 1691supmat-10-1055-a-1067-4520.pdf [file 1691supmat-10-1055-a-1067-4520.pdf]

Supplemental Table 1. Quality Scoring Parameters for Modified Newcastle-Ottawa Scale

| QUESTION                                                            | SCORING                                                                                                                                                                                                                                                                                   |
|---------------------------------------------------------------------|-------------------------------------------------------------------------------------------------------------------------------------------------------------------------------------------------------------------------------------------------------------------------------------------|
| Large cohort size                                                   | 1 point for cohort size $\geq 25$ patients<br>0 point for cohort size $< 25$ patients                                                                                                                                                                                                     |
| Length of BE segment                                                | 1 point if mean/median Prague Criteria or length of BE was reported<br>0 point if mean/median Prague Criteria or length of BE was not reported                                                                                                                                            |
| RFA/EMR performed before cryotherapy                                | 1 point if the status of RFA and EMR treatments (if applicable) prior to CbFAS were reported<br>0.5 point if the status of only RFA or EMR treatments (if applicable) prior to CbFAS were reported<br>0 point if the status of RFA and/or EMR treatments prior to CbFAS were not reported |
| No. of cryotherapy sessions/dosimetry before outcomes were assessed | 1 point if the no. of cryotherapy sessions and dosimetry was reported<br>0 point if the no. of cryotherapy sessions and/or dosimetry was not reported                                                                                                                                     |
| Adequacy of follow-up                                               | 1 point for $\geq 80\%$ of cohort was followed-up<br>0 point for $< 80\%$ of cohort was followed-up                                                                                                                                                                                       |
